# Supplementary material for: Ilaps – python software for data reduction and imaging with LA-ICP-MS
Source: Royal Society of Chemistry journal article supplement (doi:10.1039/d1ja00383f), 2022-01-01
Supplement: d1ja00383f1.pdf [file d1ja00383f1.pdf]

## Ilaps - python software for data reduction and imaging with LA-ICP-MS

Veronika Faltusová<sup>a</sup>, Tomáš Vaculovič<sup>a,b\*</sup>, Markéta Holá<sup>a</sup>, Viktor Kanický<sup>a</sup>

<sup>a</sup> Department of Chemistry, Faculty of Science, Masaryk University, Kamenice 5 62500 Brno, Czech Republic

<sup>b</sup> Institute of Laboratory Research on Geomaterials, Faculty of Natural Sciences, Comenius University in Bratislava, Mlynska dolina, Ilkovičova 6, 84215 Bratislava, Slovakia

|                                            | <b>Li7</b>   | <b>B11</b>   | <b>Na23</b>  | <b>Mg24</b>  | <b>Al27</b>  | <b>Si28</b>  | <b>P31</b>   | <b>K39</b>   | <b>Ca44</b>  | <b>Sc45</b>  | <b>Ti47</b>  | <b>V51</b>   |
|--------------------------------------------|--------------|--------------|--------------|--------------|--------------|--------------|--------------|--------------|--------------|--------------|--------------|--------------|
| Average intensity [cps]                    | 489          | 2463         | 496216       | 5453854      | 1122271      | 29551905     | 102908       | 102528102    | 2941225      | 22292        | 15202        | 2839         |
|                                            | 385          | 2169         | 431535       | 4584022      | 937431       | 24786523     | 86544        | 88639433     | 2500747      | 19389        | 12741        | 2442         |
|                                            | 500          | 2652         | 541093       | 6083328      | 1211858      | 32362090     | 106281       | 115769332    | 3347531      | 25988        | 16495        | 3140         |
|                                            | 16           | 308          | 87724        | 948449       | 1114304      | 29828573     | 179063       | 673192       | 267631       | 23603        | 15386        | 8115         |
|                                            | 4            | 394          | 41313        | 510442       | 887839       | 22331333     | 83624        | 314586       | 244420       | 18277        | 11450        | 10299        |
|                                            | <b>Li7</b>   | <b>B11</b>   | <b>Na23</b>  | <b>Mg24</b>  | <b>Al27</b>  | <b>Si28</b>  | <b>P31</b>   | <b>K39</b>   | <b>Ca44</b>  | <b>Sc45</b>  | <b>Ti47</b>  | <b>V51</b>   |
| Content [mg/kg] quantified on NIST610      | 6,91         | 176,98       | 816,22       | 13582,79     | 2851,69      | 224341,22    | 3982,87      | 92832,53     | 107126,16    | 16,52        | 156,81       | 2,10         |
|                                            | 5,45         | 155,85       | 709,83       | 11416,48     | 2382,01      | 188165,15    | 3349,55      | 80257,24     | 91082,92     | 14,37        | 131,42       | 1,80         |
|                                            | 7,07         | 190,61       | 890,04       | 15150,49     | 3079,33      | 245674,54    | 4113,43      | 104821,60    | 121924,74    | 19,25        | 170,14       | 2,32         |
|                                            | 0,22         | 22,14        | 144,30       | 2362,11      | 2831,44      | 226441,52    | 6930,34      | 609,53       | 9747,75      | 17,49        | 158,70       | 5,99         |
|                                            | 0,05         | 28,33        | 67,95        | 1271,25      | 2255,99      | 169526,75    | 3236,51      | 284,84       | 8902,34      | 13,54        | 118,11       | 7,60         |
|                                            | <b>Li7</b>   | <b>B11</b>   | <b>Na20</b>  | <b>MgO</b>   | <b>Al2O3</b> | <b>SiO2</b>  | <b>P2O5</b>  | <b>K2O</b>   | <b>CaO</b>   | <b>Sc45</b>  | <b>TiO2</b>  | <b>V51</b>   |
| Content [mg/kg] after total sum correction | 8,73         | 223,72       | 1390,74      | 28471,04     | 6810,85      | 606579,77    | 11536,44     | 141361,20    | 189469,06    | 20,88        | 330,72       | 2,65         |
|                                            | 8,14         | 232,84       | 1429,49      | 28283,65     | 6724,07      | 601321,93    | 11467,03     | 144445,25    | 190400,77    | 21,46        | 327,59       | 2,69         |
|                                            | 8,07         | 217,46       | 1368,75      | 28662,62     | 6637,89      | 599534,03    | 10753,61     | 144064,07    | 194629,85    | 21,97        | 323,88       | 2,64         |
|                                            | 0,42         | 41,68        | 366,09       | 7372,35      | 10069,30     | 911647,38    | 29889,74     | 1382,03      | 25670,78     | 32,91        | 498,38       | 11,27        |
|                                            | 0,13         | 71,23        | 230,31       | 5300,21      | 10717,28     | 911725,15    | 18646,60     | 862,73       | 31317,98     | 34,05        | 495,46       | 19,11        |
|                                            | <b>Cu63</b>  | <b>Zn66</b>  | <b>As75</b>  | <b>Rb85</b>  | <b>Sr88</b>  | <b>Y89</b>   | <b>Zr90</b>  | <b>Nb93</b>  | <b>Mo95</b>  | <b>Ag107</b> | <b>Cd111</b> | <b>Sn118</b> |
| Average intensity [cps]                    | 61056        | 48311        | 917          | 898222       | 1731773      | 3844         | 17983        | 1464         | 16           | 289          | 54           | 1552         |
|                                            | 62920        | 52693        | 909          | 925971       | 1775227      | 3838         | 18799        | 1662         | 24           | 300          | 48           | 1455         |
|                                            | 67338        | 55131        | 948          | 1005600      | 1838820      | 3912         | 19483        | 1657         | 13           | 282          | 47           | 1611         |
|                                            | 52643        | 82674        | 789          | 3804         | 213324       | 3677         | 17151        | 1353         | 845          | 41           | 86           | 990          |
|                                            | 59537        | 159391       | 1436         | 2735         | 311519       | 3970         | 20457        | 1573         | 1258         | 40           | 166          | 1330         |
|                                            | <b>Cu63</b>  | <b>Zn66</b>  | <b>As75</b>  | <b>Rb85</b>  | <b>Sr88</b>  | <b>Y89</b>   | <b>Zr90</b>  | <b>Nb93</b>  | <b>Mo95</b>  | <b>Ag107</b> | <b>Cd111</b> | <b>Sn118</b> |
| Content [mg/kg] quantified on NIST610      | 87,14        | 332,48       | 4,19         | 419,03       | 569,97       | 1,08         | 10,49        | 0,51         | 0,03         | 0,27         | 0,38         | 1,38         |
|                                            | 89,80        | 362,64       | 4,15         | 431,97       | 584,27       | 1,07         | 10,96        | 0,58         | 0,05         | 0,28         | 0,33         | 1,29         |
|                                            | 96,11        | 379,43       | 4,33         | 469,12       | 605,20       | 1,09         | 11,36        | 0,58         | 0,03         | 0,27         | 0,33         | 1,43         |
|                                            | 75,14        | 568,98       | 3,60         | 1,77         | 70,21        | 1,03         | 10,00        | 0,47         | 1,79         | 0,04         | 0,60         | 0,88         |
|                                            | 84,97        | 1096,96      | 6,56         | 1,28         | 102,53       | 1,11         | 11,93        | 0,55         | 2,67         | 0,04         | 1,16         | 1,18         |
|                                            | <b>CuO</b>   | <b>Zn66</b>  | <b>As75</b>  | <b>Rb85</b>  | <b>Sr88</b>  | <b>Y89</b>   | <b>Zr90</b>  | <b>Nb93</b>  | <b>Mo95</b>  | <b>Ag107</b> | <b>Cd111</b> | <b>SnO2</b>  |
| Content [mg/kg] after total sum correction | 137,90       | 420,27       | 5,29         | 529,67       | 720,47       | 1,36         | 13,25        | 0,64         | 0,04         | 0,34         | 0,48         | 2,21         |
|                                            | 167,96       | 541,79       | 6,20         | 645,37       | 872,90       | 1,60         | 16,38        | 0,86         | 0,08         | 0,42         | 0,50         | 2,45         |
|                                            | 137,26       | 432,87       | 4,94         | 535,21       | 690,46       | 1,25         | 12,96        | 0,66         | 0,03         | 0,30         | 0,38         | 2,07         |
|                                            | 177,03       | 1070,91      | 6,78         | 3,34         | 132,15       | 1,94         | 18,82        | 0,89         | 3,37         | 0,07         | 1,13         | 2,10         |
|                                            | 267,46       | 2758,04      | 16,49        | 3,21         | 257,78       | 2,79         | 29,99        | 1,37         | 6,70         | 0,09         | 2,92         | 3,77         |
|                                            | <b>Pr141</b> | <b>Nd146</b> | <b>Sm147</b> | <b>Eu153</b> | <b>Gd157</b> | <b>Tb159</b> | <b>Dy163</b> | <b>Ho165</b> | <b>Er166</b> | <b>Tm169</b> | <b>Yb172</b> | <b>Lu175</b> |
| Average intensity [cps]                    | 1461         | 1119         | 179          | 3978         | 286          | 220          | 294          | 245          | 249          | 126          | 180          | 117          |
|                                            | 1559         | 975          | 211          | 4085         | 315          | 182          | 336          | 265          | 283          | 120          | 160          | 111          |
|                                            | 1528         | 986          | 225          | 3924         | 327          | 227          | 250          | 229          | 250          | 136          | 196          | 131          |
|                                            | 1356         | 929          | 174          | 1789         | 251          | 200          | 256          | 234          | 249          | 119          | 159          | 107          |
|                                            | 1510         | 989          | 148          | 1322         | 223          | 207          | 239          | 223          | 237          | 133          | 199          | 105          |
|                                            | <b>Pr141</b> | <b>Nd146</b> | <b>Sm147</b> | <b>Eu153</b> | <b>Gd157</b> | <b>Tb159</b> | <b>Dy163</b> | <b>Ho165</b> | <b>Er166</b> | <b>Tm169</b> | <b>Yb172</b> | <b>Lu175</b> |
| Content [mg/kg] quantified on NIST610      | 0,24         | 1,09         | 0,20         | 1,12         | 0,30         | 0,03         | 0,18         | 0,04         | 0,12         | 0,02         | 0,12         | 0,02         |
|                                            | 0,26         | 0,95         | 0,24         | 1,15         | 0,33         | 0,03         | 0,21         | 0,04         | 0,13         | 0,02         | 0,11         | 0,01         |
|                                            | 0,25         | 0,96         | 0,25         | 1,10         | 0,34         | 0,03         | 0,16         | 0,03         | 0,12         | 0,02         | 0,13         | 0,02         |
|                                            | 0,22         | 0,91         | 0,20         | 0,50         | 0,26         | 0,03         | 0,16         | 0,03         | 0,12         | 0,02         | 0,11         | 0,01         |
|                                            | 0,25         | 0,96         | 0,17         | 0,37         | 0,23         | 0,03         | 0,15         | 0,03         | 0,11         | 0,02         | 0,13         | 0,01         |
|                                            | <b>Pr141</b> | <b>Nd146</b> | <b>Sm147</b> | <b>Eu153</b> | <b>Gd157</b> | <b>Tb159</b> | <b>Dy163</b> | <b>Ho165</b> | <b>Er166</b> | <b>Tm169</b> | <b>Yb172</b> | <b>Lu175</b> |
| Content [mg/kg] after total sum correction | 0,30         | 1,38         | 0,25         | 1,42         | 0,38         | 0,04         | 0,23         | 0,04         | 0,15         | 0,02         | 0,15         | 0,02         |
|                                            | 0,38         | 1,42         | 0,36         | 1,72         | 0,49         | 0,04         | 0,31         | 0,06         | 0,20         | 0,02         | 0,16         | 0,02         |
|                                            | 0,29         | 1,10         | 0,29         | 1,26         | 0,39         | 0,04         | 0,18         | 0,04         | 0,13         | 0,02         | 0,15         | 0,02         |
|                                            | 0,42         | 1,71         | 0,37         | 0,95         | 0,49         | 0,05         | 0,30         | 0,06         | 0,22         | 0,03         | 0,20         | 0,03         |
|                                            | 0,62         | 2,43         | 0,42         | 0,94         | 0,58         | 0,07         | 0,38         | 0,08         | 0,28         | 0,05         | 0,34         | 0,03         |

Table S1.: The 3 steps of the data reduction that can be exported from Ilaps during data processing shown on the 5 selected measurements from the archaeological glass samples dataset (showing only reduced number of isotopes).

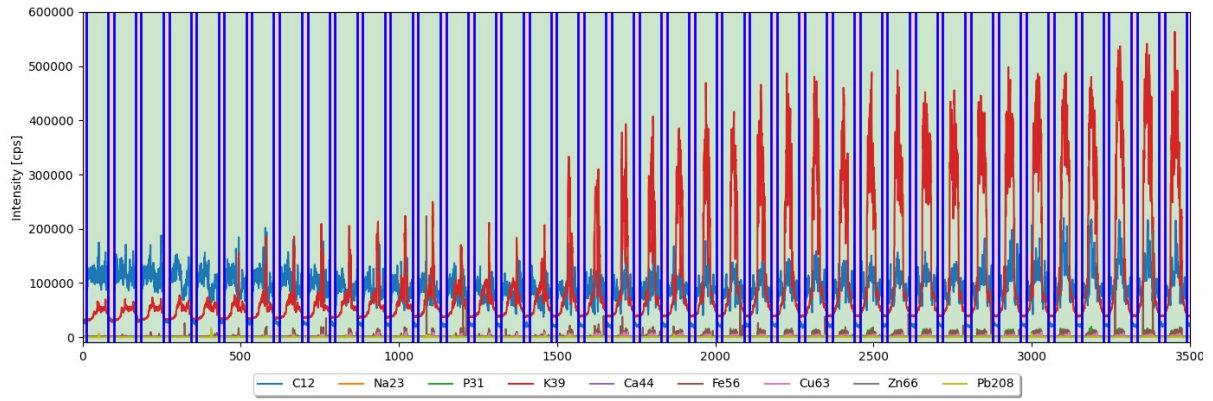

*Fig. S1: The first 3500 seconds of the analysis shown in the Data segmentation module containing the first 40 line scans of the image. The measured isotopes were  $^{12}\text{C}$ ,  $^{23}\text{Na}$ ,  $^{31}\text{P}$ ,  $^{39}\text{K}$ ,  $^{44}\text{Ca}$ ,  $^{56}\text{Fe}$ ,  $^{63}\text{Cu}$ ,  $^{66}\text{Zn}$ ,  $^{208}\text{Pb}$ . The x-axis is showing time in seconds and the y-axis Intensity in counts per seconds.*
